# Supplementary material for: Genetic Homogeneity Revealed Using SCoT, ISSR and RAPD Markers in Micropropagated Pittosporum eriocarpum Royle- An Endemic and Endangered Medicinal Plant
Source: PubMed Central journal article supplement (PMC4951010; doi:10.1371/journal.pone.0159050), 2016-07-19
Supplement: pone.0159050.s001.pdf [file pone.0159050.s001.pdf]

```

UNIANOVA SL BY BAP IBA
/METHOD=SSTYPE(3)
/INTERCEPT=INCLUDE
/EMMEANS=TABLES(OVERALL)
/PRINT=HOMOGENEITY DESCRIPTIVE
/CRITERIA=ALPHA(.05)
/DESIGN=BAP IBA BAP*IBA.

```

## Univariate Analysis of Variance

### Notes

|                        |                                   |                                                                                                                                                                                        |
|------------------------|-----------------------------------|----------------------------------------------------------------------------------------------------------------------------------------------------------------------------------------|
| Output Created         |                                   | 29-MAY-2016 23:06:40                                                                                                                                                                   |
| Comments               |                                   |                                                                                                                                                                                        |
| Input                  | Data                              | C:<br>\Users\SAMTA\Desktop\Julie\Table<br>1data file_1.sav                                                                                                                             |
|                        | Active Dataset                    | DataSet2                                                                                                                                                                               |
|                        | Filter                            | <none>                                                                                                                                                                                 |
|                        | Weight                            | <none>                                                                                                                                                                                 |
|                        | Split File                        | <none>                                                                                                                                                                                 |
|                        | N of Rows in Working<br>Data File | 120                                                                                                                                                                                    |
| Missing Value Handling | Definition of Missing             | User-defined missing values are<br>treated as missing.                                                                                                                                 |
|                        | Cases Used                        | Statistics are based on all cases with<br>valid data for all variables in the<br>model.                                                                                                |
| Syntax                 |                                   | UNIANOVA SL BY BAP IBA<br>/METHOD=SSTYPE(3)<br>/INTERCEPT=INCLUDE<br>/EMMEANS=TABLES(OVERALL)<br>/PRINT=HOMOGENEITY<br>DESCRIPTIVE<br>/CRITERIA=ALPHA(.05)<br>/DESIGN=BAP IBA BAP*IBA. |
| Resources              | Processor Time                    | 00:00:00.03                                                                                                                                                                            |
|                        | Elapsed Time                      | 00:00:00.17                                                                                                                                                                            |

[DataSet2] C:\Users\SAMTA\Desktop\Julie\Table 1data file\_1.sav

**Between-Subjects Factors**

|     |      | Value Label | N  |
|-----|------|-------------|----|
| BAP | 1.00 | 0.2         | 20 |
|     | 2.00 | 0.4         | 20 |
|     | 3.00 | 0.6         | 20 |
|     | 4.00 | 0.8         | 20 |
| IBA | 1.00 | 0.0         | 16 |
|     | 2.00 | 0.2         | 16 |
|     | 3.00 | 0.4         | 16 |
|     | 4.00 | 0.6         | 16 |
|     | 5.00 | 0.8         | 16 |

**Descriptive Statistics**

Dependent Variable: SL

| BAP   | IBA   | Mean    | Std. Deviation | N       |
|-------|-------|---------|----------------|---------|
| 0.2   | 0.0   | 28.1425 | 1.38911        | 4       |
|       | 0.2   | 26.0300 | 5.75335        | 4       |
|       | 0.4   | 27.7125 | .11843         | 4       |
|       | 0.6   | 25.5875 | .35846         | 4       |
|       | 0.8   | 26.9775 | .11206         | 4       |
|       | Total |         | 26.8900        | 2.55789 |
| 0.4   | 0.0   | 27.9550 | .73278         | 4       |
|       | 0.2   | 27.3775 | .06238         | 4       |
|       | 0.4   | 30.9775 | .56512         | 4       |
|       | 0.6   | 43.3375 | 3.84612        | 4       |
|       | 0.8   | 31.9500 | 1.13502        | 4       |
|       | Total |         | 32.3195        | 6.14752 |
| 0.6   | 0.0   | 30.2725 | .13200         | 4       |
|       | 0.2   | 31.6050 | 1.16360        | 4       |
|       | 0.4   | 33.4400 | .22405         | 4       |
|       | 0.6   | 31.3700 | 1.11633        | 4       |
|       | 0.8   | 27.5100 | .80701         | 4       |
|       | Total |         | 30.8395        | 2.12882 |
| 0.8   | 0.0   | 28.7150 | .77328         | 4       |
|       | 0.2   | 28.3225 | .73277         | 4       |
|       | 0.4   | 28.0750 | .39846         | 4       |
|       | 0.6   | 28.2050 | .27477         | 4       |
|       | 0.8   | 26.4150 | .83036         | 4       |
|       | Total |         | 27.9465        | .99523  |
| Total | 0.0   | 28.7713 | 1.22529        | 16      |
|       | 0.2   | 28.3338 | 3.39292        | 16      |
|       | 0.4   | 30.0513 | 2.42892        | 16      |

### Descriptive Statistics

Dependent Variable: SL

| BAP | IBA   | Mean    | Std. Deviation | N  |
|-----|-------|---------|----------------|----|
|     | 0.6   | 32.1250 | 7.24021        | 16 |
|     | 0.8   | 28.2131 | 2.37766        | 16 |
|     | Total | 29.4989 | 4.09796        | 80 |

### Levene's Test of Equality of Error Variances<sup>a</sup>

Dependent Variable: SL

| F     | df1 | df2 | Sig. |
|-------|-----|-----|------|
| 5.902 | 19  | 60  | .000 |

Tests the null hypothesis that the error variance of the dependent variable is equal across groups.

a. Design: Intercept + BAP + IBA + BAP \* IBA

### Tests of Between-Subjects Effects

Dependent Variable: SL

| Source          | Type III Sum of Squares | df | Mean Square | F         | Sig. |
|-----------------|-------------------------|----|-------------|-----------|------|
| Corrected Model | 1154.158 <sup>a</sup>   | 19 | 60.745      | 21.127    | .000 |
| Intercept       | 69614.690               | 1  | 69614.690   | 24211.886 | .000 |
| BAP             | 379.386                 | 3  | 126.462     | 43.983    | .000 |
| IBA             | 171.868                 | 4  | 42.967      | 14.944    | .000 |
| BAP * IBA       | 602.904                 | 12 | 50.242      | 17.474    | .000 |
| Error           | 172.514                 | 60 | 2.875       |           |      |
| Total           | 70941.362               | 80 |             |           |      |
| Corrected Total | 1326.671                | 79 |             |           |      |

a. R Squared = .870 (Adjusted R Squared = .829)

### Estimated Marginal Means

#### Grand Mean

Dependent Variable: SL

| Mean   | Std. Error | 95% Confidence Interval |             |
|--------|------------|-------------------------|-------------|
|        |            | Lower Bound             | Upper Bound |
| 29.499 | .190       | 29.120                  | 29.878      |
