# Supplementary material for: Genetic Homogeneity Revealed Using SCoT, ISSR and RAPD Markers in Micropropagated Pittosporum eriocarpum Royle- An Endemic and Endangered Medicinal Plant
Source: PubMed Central journal article supplement (PMC4951010; doi:10.1371/journal.pone.0159050), 2016-07-19
Supplement: pone.0159050.s002.pdf [file pone.0159050.s002.pdf]

```

ONEWAY ShootperExplant BY PGRs
  /STATISTICS DESCRIPTIVES HOMOGENEITY
  /MISSING ANALYSIS
  /POSTHOC=TUKEY ALPHA(0.05).

```

## Oneway

### Notes

|                        |                                                                                                     |                                                                                                              |
|------------------------|-----------------------------------------------------------------------------------------------------|--------------------------------------------------------------------------------------------------------------|
| Output Created         | 30-MAY-2016 00:19:59                                                                                |                                                                                                              |
| Comments               |                                                                                                     |                                                                                                              |
| Input                  | Data                                                                                                | F:<br>\\4thApril_2wayAnova\Multiplication_r<br>awFile_4thapril.sav                                           |
|                        | Active Dataset                                                                                      | DataSet1                                                                                                     |
|                        | Filter                                                                                              | <none>                                                                                                       |
|                        | Weight                                                                                              | <none>                                                                                                       |
|                        | Split File                                                                                          | <none>                                                                                                       |
|                        | N of Rows in Working<br>Data File                                                                   | 27                                                                                                           |
| Missing Value Handling | Definition of Missing                                                                               | User-defined missing values are<br>treated as missing.                                                       |
|                        | Cases Used                                                                                          | Statistics for each analysis are<br>based on cases with no missing data<br>for any variable in the analysis. |
| Syntax                 | ONEWAY ShootperExplant BY<br>PGRs<br>/STATISTICS DESCRIPTIVES<br>HOMOGENEITY<br>/MISSING ANALYSIS.. |                                                                                                              |
| Resources              | Processor Time                                                                                      | 00:00:00.03                                                                                                  |
|                        | Elapsed Time                                                                                        | 00:00:00.42                                                                                                  |

[DataSet1] F:\4thApril\_2wayAnova\Multiplication\_rawFile\_4thapril.sav

### Descriptives

#### ShootperExplant

|              | N  | Mean    | Std. Deviation | Std. Error | 95% Confidence Interval for Mean |             |
|--------------|----|---------|----------------|------------|----------------------------------|-------------|
|              |    |         |                |            | Lower Bound                      | Upper Bound |
| 0.4BA        | 4  | 10.6000 | 1.14310        | .57155     | 8.7811                           | 12.4189     |
| 0.6BA        | 4  | 9.8500  | 1.07548        | .53774     | 8.1387                           | 11.5613     |
| 0.4BA 0.6IBA | 4  | 14.4000 | 3.30252        | 1.65126    | 9.1449                           | 19.6551     |
| 0.6BA 0.4IBA | 4  | 9.1000  | 1.22746        | .61373     | 7.1468                           | 11.0532     |
| Total        | 16 | 10.9875 | 2.72320        | .68080     | 9.5364                           | 12.4386     |

### Descriptives

ShootperExplant

|              | Minimum | Maximum |
|--------------|---------|---------|
| 0.4BA        | 9.40    | 12.00   |
| 0.6BA        | 8.40    | 11.00   |
| 0.4BA 0.6IBA | 9.60    | 17.00   |
| 0.6BA 0.4IBA | 7.40    | 10.00   |
| Total        | 7.40    | 17.00   |

### Test of Homogeneity of Variances

ShootperExplant

| Levene Statistic | df1 | df2 | Sig. |
|------------------|-----|-----|------|
| 2.265            | 3   | 12  | .133 |

### ANOVA

ShootperExplant

|                | Sum of Squares | df | Mean Square | F     | Sig. |
|----------------|----------------|----|-------------|-------|------|
| Between Groups | 66.608         | 3  | 22.203      | 5.970 | .010 |
| Within Groups  | 44.630         | 12 | 3.719       |       |      |
| Total          | 111.238        | 15 |             |       |      |

### Post Hoc Tests

### Multiple Comparisons

Dependent Variable: ShootperExplant

Tukey HSD

| (I) PGRs     | (J) PGRs     | Mean Difference (I-J) | Std. Error | Sig. | 95% Confidence Interval |             |
|--------------|--------------|-----------------------|------------|------|-------------------------|-------------|
|              |              |                       |            |      | Lower Bound             | Upper Bound |
| 0.4BA        | 0.6BA        | .75000                | 1.36367    | .945 | -3.2986                 | 4.7986      |
|              | 0.4BA 0.6IBA | -3.80000              | 1.36367    | .068 | -7.8486                 | .2486       |
|              | 0.6BA 0.4IBA | 1.50000               | 1.36367    | .696 | -2.5486                 | 5.5486      |
| 0.6BA        | 0.4BA        | -.75000               | 1.36367    | .945 | -4.7986                 | 3.2986      |
|              | 0.4BA 0.6IBA | -4.55000*             | 1.36367    | .026 | -8.5986                 | -.5014      |
|              | 0.6BA 0.4IBA | .75000                | 1.36367    | .945 | -3.2986                 | 4.7986      |
| 0.4BA 0.6IBA | 0.4BA        | 3.80000               | 1.36367    | .068 | -.2486                  | 7.8486      |
|              | 0.6BA        | 4.55000*              | 1.36367    | .026 | .5014                   | 8.5986      |
|              | 0.6BA 0.4IBA | 5.30000*              | 1.36367    | .010 | 1.2514                  | 9.3486      |
| 0.6BA 0.4IBA | 0.4BA        | -1.50000              | 1.36367    | .696 | -5.5486                 | 2.5486      |
|              | 0.6BA        | -.75000               | 1.36367    | .945 | -4.7986                 | 3.2986      |
|              | 0.4BA 0.6IBA | -5.30000*             | 1.36367    | .010 | -9.3486                 | -1.2514     |

\*. The mean difference is significant at the 0.05 level.

### Homogeneous Subsets

ShootperExplant

Tukey HSD<sup>a</sup>

| PGRs         | N | Subset for alpha = 0.05 |         |
|--------------|---|-------------------------|---------|
|              |   | 1                       | 2       |
| 0.6BA 0.4IBA | 4 | 9.1000                  |         |
| 0.6BA        | 4 | 9.8500                  |         |
| 0.4BA        | 4 | 10.6000                 | 10.6000 |
| 0.4BA 0.6IBA | 4 |                         | 14.4000 |
| Sig.         |   | .696                    | .068    |

Means for groups in homogeneous subsets are displayed.

a. Uses Harmonic Mean Sample Size = 4.000.

```
ONEWAY LeavesPerBranch BY PGRs
/STATISTICS DESCRIPTIVES HOMOGENEITY
/MISSING ANALYSIS
/POSTHOC=DUKE ALPHA(0.05).
```

### Oneway

**Notes**

|                        |                                |                                                                                                                            |
|------------------------|--------------------------------|----------------------------------------------------------------------------------------------------------------------------|
| Output Created         |                                | 30-MAY-2016 00:22:09                                                                                                       |
| Comments               |                                |                                                                                                                            |
| Input                  | Data                           | F:<br>\\4thApril_2wayAnova\Multiplication_rawFile_4thapril.sav                                                             |
|                        | Active Dataset                 | DataSet1                                                                                                                   |
|                        | Filter                         | <none>                                                                                                                     |
|                        | Weight                         | <none>                                                                                                                     |
|                        | Split File                     | <none>                                                                                                                     |
|                        | N of Rows in Working Data File | 27                                                                                                                         |
| Missing Value Handling | Definition of Missing          | User-defined missing values are treated as missing.                                                                        |
|                        | Cases Used                     | Statistics for each analysis are based on cases with no missing data for any variable in the analysis.                     |
| Syntax                 |                                | ONEWAY LeavesPerBranch BY PGRs<br>/STATISTICS DESCRIPTIVES HOMOGENEITY<br>/MISSING ANALYSIS<br>/POSTHOC=TUKEY ALPHA(0.05). |
| Resources              | Processor Time                 | 00:00:00.03                                                                                                                |
|                        | Elapsed Time                   | 00:00:00.34                                                                                                                |

[DataSet1] F:\4thApril\_2wayAnova\Multiplication\_rawFile\_4thapril.sav

**Descriptives**

LeavesPerBranch

|              | N  | Mean    | Std. Deviation | Std. Error | 95% Confidence Interval for Mean |             |
|--------------|----|---------|----------------|------------|----------------------------------|-------------|
|              |    |         |                |            | Lower Bound                      | Upper Bound |
| 0.4BA        | 4  | 4.3900  | .48484         | .24242     | 3.6185                           | 5.1615      |
| 0.6BA        | 4  | 7.5750  | 1.26062        | .63031     | 5.5691                           | 9.5809      |
| 0.4BA 0.6IBA | 4  | 14.8500 | 1.70000        | .85000     | 12.1449                          | 17.5551     |
| 0.6BA 0.4IBA | 4  | 10.3300 | 1.56916        | .78458     | 7.8331                           | 12.8269     |
| Total        | 16 | 9.2863  | 4.14178        | 1.03544    | 7.0793                           | 11.4932     |

### Descriptives

LeavesPerBranch

|              | Minimum | Maximum |
|--------------|---------|---------|
| 0.4BA        | 4.00    | 5.00    |
| 0.6BA        | 6.00    | 9.00    |
| 0.4BA 0.6IBA | 12.40   | 16.00   |
| 0.6BA 0.4IBA | 8.32    | 12.00   |
| Total        | 4.00    | 16.00   |

### Test of Homogeneity of Variances

LeavesPerBranch

| Levene Statistic | df1 | df2 | Sig. |
|------------------|-----|-----|------|
| 1.159            | 3   | 12  | .366 |

### ANOVA

LeavesPerBranch

|                | Sum of Squares | df | Mean Square | F      | Sig. |
|----------------|----------------|----|-------------|--------|------|
| Between Groups | 235.785        | 3  | 78.595      | 43.807 | .000 |
| Within Groups  | 21.530         | 12 | 1.794       |        |      |
| Total          | 257.315        | 15 |             |        |      |

### Post Hoc Tests

### Multiple Comparisons

Dependent Variable: LeavesPerBranch

Tukey HSD

| (I) PGRs     | (J) PGRs     | Mean Difference (I-J) | Std. Error | Sig. | 95% Confidence Interval |             |
|--------------|--------------|-----------------------|------------|------|-------------------------|-------------|
|              |              |                       |            |      | Lower Bound             | Upper Bound |
| 0.4BA        | 0.6BA        | -3.18500*             | .94713     | .025 | -5.9969                 | -.3731      |
|              | 0.4BA 0.6IBA | -10.46000*            | .94713     | .000 | -13.2719                | -7.6481     |
|              | 0.6BA 0.4IBA | -5.94000*             | .94713     | .000 | -8.7519                 | -3.1281     |
| 0.6BA        | 0.4BA        | 3.18500*              | .94713     | .025 | .3731                   | 5.9969      |
|              | 0.4BA 0.6IBA | -7.27500*             | .94713     | .000 | -10.0869                | -4.4631     |
|              | 0.6BA 0.4IBA | -2.75500              | .94713     | .055 | -5.5669                 | .0569       |
| 0.4BA 0.6IBA | 0.4BA        | 10.46000*             | .94713     | .000 | 7.6481                  | 13.2719     |
|              | 0.6BA        | 7.27500*              | .94713     | .000 | 4.4631                  | 10.0869     |
|              | 0.6BA 0.4IBA | 4.52000*              | .94713     | .002 | 1.7081                  | 7.3319      |
| 0.6BA 0.4IBA | 0.4BA        | 5.94000*              | .94713     | .000 | 3.1281                  | 8.7519      |
|              | 0.6BA        | 2.75500               | .94713     | .055 | -.0569                  | 5.5669      |
|              | 0.4BA 0.6IBA | -4.52000*             | .94713     | .002 | -7.3319                 | -1.7081     |

\*. The mean difference is significant at the 0.05 level.

### Homogeneous Subsets

LeavesPerBranch

Tukey HSD<sup>a</sup>

| PGRs         | N | Subset for alpha = 0.05 |         |         |
|--------------|---|-------------------------|---------|---------|
|              |   | 1                       | 2       | 3       |
| 0.4BA        | 4 | 4.3900                  |         |         |
| 0.6BA        | 4 |                         | 7.5750  |         |
| 0.6BA 0.4IBA | 4 |                         | 10.3300 |         |
| 0.4BA 0.6IBA | 4 |                         |         | 14.8500 |
| Sig.         |   | 1.000                   | .055    | 1.000   |

Means for groups in homogeneous subsets are displayed.

a. Uses Harmonic Mean Sample Size = 4.000.

```

ONEWAY CallusDiameter BY PGRs
  /STATISTICS DESCRIPTIVES HOMOGENEITY
  /MISSING ANALYSIS
  /POSTHOC= TUKEY ALPHA(0.05).

```

### Oneway

**Notes**

|                        |                                   |                                                                                                                              |
|------------------------|-----------------------------------|------------------------------------------------------------------------------------------------------------------------------|
| Output Created         |                                   | 30-MAY-2016 00:22:54                                                                                                         |
| Comments               |                                   |                                                                                                                              |
| Input                  | Data                              | F:<br>\\4thApril_2wayAnova\Multiplication_r<br>awFile_4thapril.sav                                                           |
|                        | Active Dataset                    | DataSet1                                                                                                                     |
|                        | Filter                            | <none>                                                                                                                       |
|                        | Weight                            | <none>                                                                                                                       |
|                        | Split File                        | <none>                                                                                                                       |
|                        | N of Rows in Working<br>Data File | 27                                                                                                                           |
| Missing Value Handling | Definition of Missing             | User-defined missing values are<br>treated as missing.                                                                       |
|                        | Cases Used                        | Statistics for each analysis are<br>based on cases with no missing data<br>for any variable in the analysis.                 |
| Syntax                 |                                   | ONEWAY CallusDiameter BY PGRs<br>/STATISTICS DESCRIPTIVES<br>HOMOGENEITY<br>/MISSING ANALYSIS<br>/POSTHOC=TUKEY ALPHA(0.05). |
| Resources              | Processor Time                    | 00:00:00.03                                                                                                                  |
|                        | Elapsed Time                      | 00:00:00.08                                                                                                                  |

[DataSet1] F:\4thApril\_2wayAnova\Multiplication\_rawFile\_4thapril.sav

**Descriptives**

CallusDiameter

|              | N  | Mean    | Std. Deviation | Std. Error | 95% Confidence Interval for Mean |             |
|--------------|----|---------|----------------|------------|----------------------------------|-------------|
|              |    |         |                |            | Lower Bound                      | Upper Bound |
| 0.4BA        | 4  | 8.1075  | .63174         | .31587     | 7.1023                           | 9.1127      |
| 0.6BA        | 4  | 7.9650  | .33191         | .16596     | 7.4369                           | 8.4931      |
| 0.4BA 0.6IBA | 4  | 11.2675 | 1.69159        | .84580     | 8.5758                           | 13.9592     |
| 0.6BA 0.4IBA | 4  | 9.4275  | 1.90783        | .95392     | 6.3917                           | 12.4633     |
| Total        | 16 | 9.1919  | 1.81128        | .45282     | 8.2267                           | 10.1570     |

### Descriptives

CallusDiameter

|              | Minimum | Maximum |
|--------------|---------|---------|
| 0.4BA        | 7.39    | 8.93    |
| 0.6BA        | 7.51    | 8.28    |
| 0.4BA 0.6IBA | 10.00   | 13.67   |
| 0.6BA 0.4IBA | 8.03    | 12.14   |
| Total        | 7.39    | 13.67   |

### Test of Homogeneity of Variances

CallusDiameter

| Levene Statistic | df1 | df2 | Sig. |
|------------------|-----|-----|------|
| 2.149            | 3   | 12  | .147 |

### ANOVA

CallusDiameter

|                | Sum of Squares | df | Mean Square | F     | Sig. |
|----------------|----------------|----|-------------|-------|------|
| Between Groups | 28.179         | 3  | 9.393       | 5.359 | .014 |
| Within Groups  | 21.032         | 12 | 1.753       |       |      |
| Total          | 49.211         | 15 |             |       |      |

### Post Hoc Tests



### Multiple Comparisons

Dependent Variable: CallusDiameter

Tukey HSD

| (I) PGRs     | (J) PGRs     | Mean Difference (I-J) | Std. Error | Sig. | 95% Confidence Interval |             |
|--------------|--------------|-----------------------|------------|------|-------------------------|-------------|
|              |              |                       |            |      | Lower Bound             | Upper Bound |
| 0.4BA        | 0.6BA        | .14250                | .93612     | .999 | -2.6367                 | 2.9217      |
|              | 0.4BA 0.6IBA | -3.16000*             | .93612     | .025 | -5.9392                 | -.3808      |
|              | 0.6BA 0.4IBA | -1.32000              | .93612     | .517 | -4.0992                 | 1.4592      |
| 0.6BA        | 0.4BA        | -.14250               | .93612     | .999 | -2.9217                 | 2.6367      |
|              | 0.4BA 0.6IBA | -3.30250*             | .93612     | .019 | -6.0817                 | -.5233      |
|              | 0.6BA 0.4IBA | -1.46250              | .93612     | .434 | -4.2417                 | 1.3167      |
| 0.4BA 0.6IBA | 0.4BA        | 3.16000*              | .93612     | .025 | .3808                   | 5.9392      |
|              | 0.6BA        | 3.30250*              | .93612     | .019 | .5233                   | 6.0817      |
|              | 0.6BA 0.4IBA | 1.84000               | .93612     | .254 | -.9392                  | 4.6192      |
| 0.6BA 0.4IBA | 0.4BA        | 1.32000               | .93612     | .517 | -1.4592                 | 4.0992      |
|              | 0.6BA        | 1.46250               | .93612     | .434 | -1.3167                 | 4.2417      |
|              | 0.4BA 0.6IBA | -1.84000              | .93612     | .254 | -4.6192                 | .9392       |

\*. The mean difference is significant at the 0.05 level.

### Homogeneous Subsets

CallusDiameter

Tukey HSD<sup>a</sup>

| PGRs         | N | Subset for alpha = 0.05 |         |
|--------------|---|-------------------------|---------|
|              |   | 1                       | 2       |
| 0.6BA        | 4 | 7.9650                  |         |
| 0.4BA        | 4 | 8.1075                  |         |
| 0.6BA 0.4IBA | 4 | 9.4275                  | 9.4275  |
| 0.4BA 0.6IBA | 4 |                         | 11.2675 |
| Sig.         |   | .434                    | .254    |

Means for groups in homogeneous subsets are displayed.

a. Uses Harmonic Mean Sample Size = 4.000.
