# Supplementary material for: Genetic Homogeneity Revealed Using SCoT, ISSR and RAPD Markers in Micropropagated Pittosporum eriocarpum Royle- An Endemic and Endangered Medicinal Plant
Source: PubMed Central journal article supplement (PMC4951010; doi:10.1371/journal.pone.0159050), 2016-07-19
Supplement: pone.0159050.s003.pdf [file pone.0159050.s003.pdf]

```

UNIANOVA RootPerShoot BY HormoneType Concentration
/METHOD=SSTYPE(3)
/INTERCEPT=INCLUDE
/POSTHOC=HormoneType Concentration(TUKEY)
/EMMEANS=TABLES(OVERALL)
/EMMEANS=TABLES(HormoneType) COMPARE ADJ(LSD)
/EMMEANS=TABLES(Concentration) COMPARE ADJ(LSD)
/EMMEANS=TABLES(HormoneType*Concentration)
/PRINT=HOMOGENEITY DESCRIPTIVE
/CRITERIA=ALPHA(.05)
/DESIGN=HormoneType Concentration HormoneType*Concentration.

```

## Univariate Analysis of Variance

### Notes

|                        |                                |                                                                                   |
|------------------------|--------------------------------|-----------------------------------------------------------------------------------|
| Output Created         |                                | 29-MAY-2016 23:31:52                                                              |
| Comments               |                                |                                                                                   |
| Input                  | Data                           | C:\Users\SAMTA\Desktop\Julie\table 3 a,b,c12thApril twao way anova data file.sav  |
|                        | Active Dataset                 | DataSet1                                                                          |
|                        | Filter                         | <none>                                                                            |
|                        | Weight                         | <none>                                                                            |
|                        | Split File                     | <none>                                                                            |
|                        | N of Rows in Working Data File | 60                                                                                |
| Missing Value Handling | Definition of Missing          | User-defined missing values are treated as missing.                               |
|                        | Cases Used                     | Statistics are based on all cases with valid data for all variables in the model. |

**Notes**

|           |                                                                                                                                                                                                                                                                                                                                                                                                                                                                                       |  |             |
|-----------|---------------------------------------------------------------------------------------------------------------------------------------------------------------------------------------------------------------------------------------------------------------------------------------------------------------------------------------------------------------------------------------------------------------------------------------------------------------------------------------|--|-------------|
| Syntax    | UNIANOVA RootPerShoot BY<br>HormoneType Concentration<br>/METHOD=SSTYPE(3)<br>/INTERCEPT=INCLUDE<br>/POSTHOC=HormoneType<br>Concentration(TUKEY)<br>/EMMEANS=TABLES(OVERALL)<br>/EMMEANS=TABLES<br>(HormoneType) COMPARE ADJ<br>(LSD)<br>/EMMEANS=TABLES<br>(Concentration) COMPARE ADJ<br>(LSD)<br>/EMMEANS=TABLES<br>(HormoneType*Concentration)<br>/PRINT=HOMOGENEITY<br>DESCRIPTIVE<br>/CRITERIA=ALPHA(.05)<br>/DESIGN=HormoneType<br>Concentration<br>HormoneType*Concentration. |  |             |
| Resources | Processor Time                                                                                                                                                                                                                                                                                                                                                                                                                                                                        |  | 00:00:00.11 |
|           | Elapsed Time                                                                                                                                                                                                                                                                                                                                                                                                                                                                          |  | 00:00:00.64 |

[DataSet1] C:\Users\SAMTA\Desktop\Julie\table 3 a,b,c12thApril twao way anova data file.sav

**Between-Subjects Factors**

|               |      | Value Label | N  |
|---------------|------|-------------|----|
| HormoneType   | 1.00 | IAA         | 20 |
|               | 2.00 | IBA         | 20 |
|               | 3.00 | NAA         | 20 |
| Concentration | 1.00 | 0.2         | 12 |
|               | 2.00 | 0.4         | 12 |
|               | 3.00 | 0.6         | 12 |
|               | 4.00 | 0.8         | 12 |
|               | 5.00 | 1.0         | 12 |

### Descriptive Statistics

Dependent Variable: RootPerShoot

| HormoneType | Concentration | Mean    | Std. Deviation | N       |
|-------------|---------------|---------|----------------|---------|
| IAA         | 0.2           | 2.6500  | .47258         | 4       |
|             | 0.4           | 6.0000  | .81650         | 4       |
|             | 0.6           | 3.9250  | .83016         | 4       |
|             | 0.8           | 3.5250  | 1.05000        | 4       |
|             | 1.0           | .0000   | .00000         | 4       |
|             | Total         |         | 3.2200         | 2.10378 |
| IBA         | 0.2           | 2.0000  | .00000         | 4       |
|             | 0.4           | 2.5500  | .52599         | 4       |
|             | 0.6           | 12.7750 | 2.58247        | 4       |
|             | 0.8           | 2.0250  | .81803         | 4       |
|             | 1.0           | 1.7500  | .50000         | 4       |
|             | Total         |         | 4.2200         | 4.53578 |
| NAA         | 0.2           | 1.6250  | .47871         | 4       |
|             | 0.4           | 7.6250  | .47871         | 4       |
|             | 0.6           | 1.8000  | .97980         | 4       |
|             | 0.8           | 1.5000  | .57735         | 4       |
|             | 1.0           | .0000   | .00000         | 4       |
|             | Total         |         | 2.5100         | 2.75622 |
| Total       | 0.2           | 2.0917  | .56481         | 12      |
|             | 0.4           | 5.3917  | 2.28133        | 12      |
|             | 0.6           | 6.1667  | 5.18746        | 12      |
|             | 0.8           | 2.3500  | 1.17357        | 12      |
|             | 1.0           | .5833   | .90034         | 12      |
|             | Total         |         | 3.3167         | 3.31622 |

### Levene's Test of Equality of Error Variances<sup>a</sup>

Dependent Variable: RootPerShoot

| F     | df1 | df2 | Sig. |
|-------|-----|-----|------|
| 3.279 | 14  | 45  | .001 |

Tests the null hypothesis that the error variance of the dependent variable is equal across groups.

a. Design: Intercept + HormoneType + Concentration + HormoneType \* Concentration

### Tests of Between-Subjects Effects

Dependent Variable: RootPerShoot

| Source                      | Type III Sum of Squares | df | Mean Square | F       | Sig. |
|-----------------------------|-------------------------|----|-------------|---------|------|
| Corrected Model             | 611.948 <sup>a</sup>    | 14 | 43.711      | 53.313  | .000 |
| Intercept                   | 660.017                 | 1  | 660.017     | 805.007 | .000 |
| HormoneType                 | 29.521                  | 2  | 14.761      | 18.003  | .000 |
| Concentration               | 268.012                 | 4  | 67.003      | 81.722  | .000 |
| HormoneType * Concentration | 314.415                 | 8  | 39.302      | 47.936  | .000 |
| Error                       | 36.895                  | 45 | .820        |         |      |
| Total                       | 1308.860                | 60 |             |         |      |
| Corrected Total             | 648.843                 | 59 |             |         |      |

a. R Squared = .943 (Adjusted R Squared = .925)

### Estimated Marginal Means

#### 1. Grand Mean

Dependent Variable: RootPerShoot

| Mean  | Std. Error | 95% Confidence Interval |             |
|-------|------------|-------------------------|-------------|
|       |            | Lower Bound             | Upper Bound |
| 3.317 | .117       | 3.081                   | 3.552       |

#### 2. HormoneType

##### Estimates

Dependent Variable: RootPerShoot

| HormoneType | Mean  | Std. Error | 95% Confidence Interval |             |
|-------------|-------|------------|-------------------------|-------------|
|             |       |            | Lower Bound             | Upper Bound |
| IAA         | 3.220 | .202       | 2.812                   | 3.628       |
| IBA         | 4.220 | .202       | 3.812                   | 4.628       |
| NAA         | 2.510 | .202       | 2.102                   | 2.918       |

### Pairwise Comparisons

Dependent Variable: RootPerShoot

| (I) HormoneType | (J) HormoneType | Mean Difference (I-J) | Std. Error | Sig. <sup>b</sup> | 95% Confidence Int. |
|-----------------|-----------------|-----------------------|------------|-------------------|---------------------|
|                 |                 |                       |            |                   | Lower Bound         |
| IAA             | IBA             | -1.000 <sup>*</sup>   | .286       | .001              | -1.577              |
|                 | NAA             | .710 <sup>*</sup>     | .286       | .017              | .133                |
| IBA             | IAA             | 1.000 <sup>*</sup>    | .286       | .001              | .423                |
|                 | NAA             | 1.710 <sup>*</sup>    | .286       | .000              | 1.133               |
| NAA             | IAA             | -.710 <sup>*</sup>    | .286       | .017              | -1.287              |
|                 | IBA             | -1.710 <sup>*</sup>   | .286       | .000              | -2.287              |

### Pairwise Comparisons

Dependent Variable: RootPerShoot

| (I) HormoneType | (J) HormoneType | 95% Confidence Int. |
|-----------------|-----------------|---------------------|
|                 |                 | Upper Bound         |
| IAA             | IBA             | -.423               |
|                 | NAA             | 1.287               |
| IBA             | IAA             | 1.577               |
|                 | NAA             | 2.287               |
| NAA             | IAA             | -.133               |
|                 | IBA             | -1.133              |

Based on estimated marginal means

\*. The mean difference is significant at the .05 level.

b. Adjustment for multiple comparisons: Least Significant Difference (equivalent to no adjustments).

### Univariate Tests

Dependent Variable: RootPerShoot

|          | Sum of Squares | df | Mean Square | F      | Sig. |
|----------|----------------|----|-------------|--------|------|
| Contrast | 29.521         | 2  | 14.761      | 18.003 | .000 |
| Error    | 36.895         | 45 | .820        |        |      |

The F tests the effect of HormoneType. This test is based on the linearly independent pairwise comparisons among the estimated marginal means.

## 3. Concentration

**Estimates**

Dependent Variable: RootPerShoot

| Concentration | Mean  | Std. Error | 95% Confidence Interval |             |
|---------------|-------|------------|-------------------------|-------------|
|               |       |            | Lower Bound             | Upper Bound |
| 0.2           | 2.092 | .261       | 1.565                   | 2.618       |
| 0.4           | 5.392 | .261       | 4.865                   | 5.918       |
| 0.6           | 6.167 | .261       | 5.640                   | 6.693       |
| 0.8           | 2.350 | .261       | 1.824                   | 2.876       |
| 1.0           | .583  | .261       | .057                    | 1.110       |

**Pairwise Comparisons**

Dependent Variable: RootPerShoot

| (I) Concentration | (J) Concentration | Mean Difference (I-J) | Std. Error | Sig. <sup>b</sup> | 95% Confidence Interval |
|-------------------|-------------------|-----------------------|------------|-------------------|-------------------------|
|                   |                   |                       |            |                   | Lower Bound             |
| 0.2               | 0.4               | -3.300*               | .370       | .000              | -4.045                  |
|                   | 0.6               | -4.075*               | .370       | .000              | -4.820                  |
|                   | 0.8               | -.258                 | .370       | .488              | -1.003                  |
|                   | 1.0               | 1.508*                | .370       | .000              | .764                    |
| 0.4               | 0.2               | 3.300*                | .370       | .000              | 2.555                   |
|                   | 0.6               | -.775*                | .370       | .042              | -1.520                  |
|                   | 0.8               | 3.042*                | .370       | .000              | 2.297                   |
|                   | 1.0               | 4.808*                | .370       | .000              | 4.064                   |
| 0.6               | 0.2               | 4.075*                | .370       | .000              | 3.330                   |
|                   | 0.4               | .775*                 | .370       | .042              | .030                    |
|                   | 0.8               | 3.817*                | .370       | .000              | 3.072                   |
|                   | 1.0               | 5.583*                | .370       | .000              | 4.839                   |
| 0.8               | 0.2               | .258                  | .370       | .488              | -.486                   |
|                   | 0.4               | -3.042*               | .370       | .000              | -3.786                  |
|                   | 0.6               | -3.817*               | .370       | .000              | -4.561                  |
|                   | 1.0               | 1.767*                | .370       | .000              | 1.022                   |
| 1.0               | 0.2               | -1.508*               | .370       | .000              | -2.253                  |
|                   | 0.4               | -4.808*               | .370       | .000              | -5.553                  |
|                   | 0.6               | -5.583*               | .370       | .000              | -6.328                  |
|                   | 0.8               | -1.767*               | .370       | .000              | -2.511                  |

### Pairwise Comparisons

Dependent Variable: RootPerShoot

| (I) Concentration | (J) Concentration | 95% Confidence b... |
|-------------------|-------------------|---------------------|
|                   |                   | Upper Bound         |
| 0.2               | 0.4               | -2.555              |
|                   | 0.6               | -3.330              |
|                   | 0.8               | .486                |
|                   | 1.0               | 2.253               |
| 0.4               | 0.2               | 4.045               |
|                   | 0.6               | -.030               |
|                   | 0.8               | 3.786               |
|                   | 1.0               | 5.553               |
| 0.6               | 0.2               | 4.820               |
|                   | 0.4               | 1.520               |
|                   | 0.8               | 4.561               |
|                   | 1.0               | 6.328               |
| 0.8               | 0.2               | 1.003               |
|                   | 0.4               | -2.297              |
|                   | 0.6               | -3.072              |
|                   | 1.0               | 2.511               |
| 1.0               | 0.2               | -.764               |
|                   | 0.4               | -4.064              |
|                   | 0.6               | -4.839              |
|                   | 0.8               | -1.022              |

Based on estimated marginal means

\*. The mean difference is significant at the .05 level.

b. Adjustment for multiple comparisons: Least Significant Difference (equivalent to no adjustments).

### Univariate Tests

Dependent Variable: RootPerShoot

|          | Sum of Squares | df | Mean Square | F      | Sig. |
|----------|----------------|----|-------------|--------|------|
| Contrast | 268.012        | 4  | 67.003      | 81.722 | .000 |
| Error    | 36.895         | 45 | .820        |        |      |

The F tests the effect of Concentration. This test is based on the linearly independent pairwise comparisons among the estimated marginal means.

#### 4. HormoneType \* Concentration

Dependent Variable: RootPerShoot

| HormoneType | Concentration | Mean        | Std. Error | 95% Confidence Interval |             |
|-------------|---------------|-------------|------------|-------------------------|-------------|
|             |               |             |            | Lower Bound             | Upper Bound |
| IAA         | 0.2           | 2.650       | .453       | 1.738                   | 3.562       |
|             | 0.4           | 6.000       | .453       | 5.088                   | 6.912       |
|             | 0.6           | 3.925       | .453       | 3.013                   | 4.837       |
|             | 0.8           | 3.525       | .453       | 2.613                   | 4.437       |
|             | 1.0           | 1.025E-013  | .453       | -.912                   | .912        |
| IBA         | 0.2           | 2.000       | .453       | 1.088                   | 2.912       |
|             | 0.4           | 2.550       | .453       | 1.638                   | 3.462       |
|             | 0.6           | 12.775      | .453       | 11.863                  | 13.687      |
|             | 0.8           | 2.025       | .453       | 1.113                   | 2.937       |
|             | 1.0           | 1.750       | .453       | .838                    | 2.662       |
| NAA         | 0.2           | 1.625       | .453       | .713                    | 2.537       |
|             | 0.4           | 7.625       | .453       | 6.713                   | 8.537       |
|             | 0.6           | 1.800       | .453       | .888                    | 2.712       |
|             | 0.8           | 1.500       | .453       | .588                    | 2.412       |
|             | 1.0           | -1.014E-013 | .453       | -.912                   | .912        |

### Post Hoc Tests

#### HormoneType

#### Multiple Comparisons

Dependent Variable: RootPerShoot

Tukey HSD

| (I) HormoneType | (J) HormoneType | Mean Difference (I-J) | Std. Error | Sig. | 95% ...     |
|-----------------|-----------------|-----------------------|------------|------|-------------|
|                 |                 |                       |            |      | Lower Bound |
| IAA             | IBA             | -1.0000*              | .28634     | .003 | -1.6940     |
|                 | NAA             | .7100*                | .28634     | .044 | .0160       |
| IBA             | IAA             | 1.0000*               | .28634     | .003 | .3060       |
|                 | NAA             | 1.7100*               | .28634     | .000 | 1.0160      |
| NAA             | IAA             | -.7100*               | .28634     | .044 | -1.4040     |
|                 | IBA             | -1.7100*              | .28634     | .000 | -2.4040     |



### Multiple Comparisons

Dependent Variable: RootPerShoot

Tukey HSD

|                 |                 | 95% ...     |
|-----------------|-----------------|-------------|
| (I) HormoneType | (J) HormoneType | Upper Bound |
| IAA             | IBA             | -.3060      |
|                 | NAA             | 1.4040      |
| IBA             | IAA             | 1.6940      |
|                 | NAA             | 2.4040      |
| NAA             | IAA             | -.0160      |
|                 | IBA             | -1.0160     |

Based on observed means.

The error term is Mean Square(Error) = .820.

\*. The mean difference is significant at the .05 level.

### Homogeneous Subsets

#### RootPerShoot

Tukey HSD<sup>a,b</sup>

| HormoneType | N  | Subset |        |        |
|-------------|----|--------|--------|--------|
|             |    | 1      | 2      | 3      |
| NAA         | 20 | 2.5100 |        |        |
| IAA         | 20 |        | 3.2200 |        |
| IBA         | 20 |        |        | 4.2200 |
| Sig.        |    | 1.000  | 1.000  | 1.000  |

Means for groups in homogeneous subsets are displayed.

Based on observed means.

The error term is Mean Square(Error) = .820.

a. Uses Harmonic Mean Sample Size = 20.000.

b. Alpha = .05.

### Concentration

### Multiple Comparisons

Dependent Variable: RootPerShoot

Tukey HSD

| (I) Concentration | (J) Concentration | Mean Difference (I-J) | Std. Error | Sig. | 95% ...     |
|-------------------|-------------------|-----------------------|------------|------|-------------|
|                   |                   |                       |            |      | Lower Bound |
| 0.2               | 0.4               | -3.3000*              | .36966     | .000 | -4.3504     |
|                   | 0.6               | -4.0750*              | .36966     | .000 | -5.1254     |
|                   | 0.8               | -.2583                | .36966     | .956 | -1.3087     |
|                   | 1.0               | 1.5083*               | .36966     | .002 | .4580       |
| 0.4               | 0.2               | 3.3000*               | .36966     | .000 | 2.2496      |
|                   | 0.6               | -.7750                | .36966     | .239 | -1.8254     |
|                   | 0.8               | 3.0417*               | .36966     | .000 | 1.9913      |
|                   | 1.0               | 4.8083*               | .36966     | .000 | 3.7580      |
| 0.6               | 0.2               | 4.0750*               | .36966     | .000 | 3.0246      |
|                   | 0.4               | .7750                 | .36966     | .239 | -.2754      |
|                   | 0.8               | 3.8167*               | .36966     | .000 | 2.7663      |
|                   | 1.0               | 5.5833*               | .36966     | .000 | 4.5330      |
| 0.8               | 0.2               | .2583                 | .36966     | .956 | -.7920      |
|                   | 0.4               | -3.0417*              | .36966     | .000 | -4.0920     |
|                   | 0.6               | -3.8167*              | .36966     | .000 | -4.8670     |
|                   | 1.0               | 1.7667*               | .36966     | .000 | .7163       |
| 1.0               | 0.2               | -1.5083*              | .36966     | .002 | -2.5587     |
|                   | 0.4               | -4.8083*              | .36966     | .000 | -5.8587     |
|                   | 0.6               | -5.5833*              | .36966     | .000 | -6.6337     |
|                   | 0.8               | -1.7667*              | .36966     | .000 | -2.8170     |

### Multiple Comparisons

Dependent Variable: RootPerShoot

Tukey HSD

|                   |                   | 95% ...     |
|-------------------|-------------------|-------------|
| (I) Concentration | (J) Concentration | Upper Bound |
| 0.2               | 0.4               | -2.2496     |
|                   | 0.6               | -3.0246     |
|                   | 0.8               | .7920       |
|                   | 1.0               | 2.5587      |
| 0.4               | 0.2               | 4.3504      |
|                   | 0.6               | .2754       |
|                   | 0.8               | 4.0920      |
|                   | 1.0               | 5.8587      |
| 0.6               | 0.2               | 5.1254      |
|                   | 0.4               | 1.8254      |
|                   | 0.8               | 4.8670      |
|                   | 1.0               | 6.6337      |
| 0.8               | 0.2               | 1.3087      |
|                   | 0.4               | -1.9913     |
|                   | 0.6               | -2.7663     |
|                   | 1.0               | 2.8170      |
| 1.0               | 0.2               | -.4580      |
|                   | 0.4               | -3.7580     |
|                   | 0.6               | -4.5330     |
|                   | 0.8               | -.7163      |

Based on observed means.

The error term is Mean Square(Error) = .820.

\*. The mean difference is significant at the .05 level.

### Homogeneous Subsets

### RootPerShoot

Tukey HSD<sup>a,b</sup>

| Concentration | N  | Subset |        |        |
|---------------|----|--------|--------|--------|
|               |    | 1      | 2      | 3      |
| 1.0           | 12 | .5833  |        |        |
| 0.2           | 12 |        | 2.0917 |        |
| 0.8           | 12 |        | 2.3500 |        |
| 0.4           | 12 |        |        | 5.3917 |
| 0.6           | 12 |        |        | 6.1667 |
| Sig.          |    | 1.000  | .956   | .239   |

Means for groups in homogeneous subsets are displayed.

Based on observed means.

The error term is Mean Square(Error) = .820.

a. Uses Harmonic Mean Sample Size = 12.000.

b. Alpha = .05.

```

UNIANOVA RootLength BY HormoneType Concentration
/METHOD=SSTYPE(3)
/INTERCEPT=INCLUDE
/POSTHOC=HormoneType Concentration(TUKEY)
/EMMEANS=TABLES(OVERALL)
/EMMEANS=TABLES(HormoneType) COMPARE ADJ(LSD)
/EMMEANS=TABLES(Concentration) COMPARE ADJ(LSD)
/EMMEANS=TABLES(HormoneType*Concentration)
/PRINT=HOMOGENEITY DESCRIPTIVE
/CRITERIA=ALPHA(.05)
/DESIGN=HormoneType Concentration HormoneType*Concentration.

```

## Univariate Analysis of Variance

**Notes**

|                        |                                |                                                                                                                                                                                                                                                                                                                                                                                                                                      |
|------------------------|--------------------------------|--------------------------------------------------------------------------------------------------------------------------------------------------------------------------------------------------------------------------------------------------------------------------------------------------------------------------------------------------------------------------------------------------------------------------------------|
| Output Created         |                                | 29-MAY-2016 23:33:49                                                                                                                                                                                                                                                                                                                                                                                                                 |
| Comments               |                                |                                                                                                                                                                                                                                                                                                                                                                                                                                      |
| Input                  | Data                           | C:\Users\SAMTA\Desktop\Julie\table 3 a,b,c12thApril twao way anova data file.sav                                                                                                                                                                                                                                                                                                                                                     |
|                        | Active Dataset                 | DataSet1                                                                                                                                                                                                                                                                                                                                                                                                                             |
|                        | Filter                         | <none>                                                                                                                                                                                                                                                                                                                                                                                                                               |
|                        | Weight                         | <none>                                                                                                                                                                                                                                                                                                                                                                                                                               |
|                        | Split File                     | <none>                                                                                                                                                                                                                                                                                                                                                                                                                               |
|                        | N of Rows in Working Data File | 60                                                                                                                                                                                                                                                                                                                                                                                                                                   |
| Missing Value Handling | Definition of Missing          | User-defined missing values are treated as missing.                                                                                                                                                                                                                                                                                                                                                                                  |
|                        | Cases Used                     | Statistics are based on all cases with valid data for all variables in the model.                                                                                                                                                                                                                                                                                                                                                    |
| Syntax                 |                                | <pre> UNIANOVA RootLength BY HormoneType Concentration /METHOD=SSTYPE(3) /INTERCEPT=INCLUDE /POSTHOC=HormoneType Concentration(TUKEY) /EMMEANS=TABLES(OVERALL) /EMMEANS=TABLES (HormoneType) COMPARE ADJ (LSD) /EMMEANS=TABLES (Concentration) COMPARE ADJ (LSD) /EMMEANS=TABLES (HormoneType*Concentration) /PRINT=HOMOGENEITY DESCRIPTIVE /CRITERIA=ALPHA(.05) /DESIGN=HormoneType Concentration HormoneType*Concentration. </pre> |
| Resources              | Processor Time                 | 00:00:00.11                                                                                                                                                                                                                                                                                                                                                                                                                          |
|                        | Elapsed Time                   | 00:00:00.33                                                                                                                                                                                                                                                                                                                                                                                                                          |

[DataSet1] C:\Users\SAMTA\Desktop\Julie\table 3 a,b,c12thApril twao way anova data file.sav

**Between-Subjects Factors**

|               |      | Value Label | N  |
|---------------|------|-------------|----|
| HormoneType   | 1.00 | IAA         | 20 |
|               | 2.00 | IBA         | 20 |
|               | 3.00 | NAA         | 20 |
| Concentration | 1.00 | 0.2         | 12 |
|               | 2.00 | 0.4         | 12 |
|               | 3.00 | 0.6         | 12 |
|               | 4.00 | 0.8         | 12 |
|               | 5.00 | 1.0         | 12 |

**Descriptive Statistics**

Dependent Variable: RootLength

| HormoneType | Concentration | Mean    | Std. Deviation | N        |
|-------------|---------------|---------|----------------|----------|
| IAA         | 0.2           | 10.0250 | 1.07308        | 4        |
|             | 0.4           | 13.0475 | 2.96766        | 4        |
|             | 0.6           | 6.9950  | 1.00785        | 4        |
|             | 0.8           | 5.5625  | 1.08106        | 4        |
|             | 1.0           | .0000   | .00000         | 4        |
|             | Total         |         | 7.1260         | 4.71988  |
| IBA         | 0.2           | 15.5700 | .97806         | 4        |
|             | 0.4           | 18.2850 | 3.96607        | 4        |
|             | 0.6           | 36.3950 | 10.36647       | 4        |
|             | 0.8           | 7.6825  | 1.25985        | 4        |
|             | 1.0           | 10.4275 | 2.32381        | 4        |
|             | Total         |         | 17.6720        | 11.29481 |
| NAA         | 0.2           | 18.8325 | 8.63941        | 4        |
|             | 0.4           | 22.4650 | 3.10810        | 4        |
|             | 0.6           | 8.2450  | 1.71327        | 4        |
|             | 0.8           | 13.1550 | 1.39117        | 4        |
|             | 1.0           | .0000   | .00000         | 4        |
|             | Total         |         | 12.5395        | 8.95669  |
| Total       | 0.2           | 14.8092 | 5.94566        | 12       |
|             | 0.4           | 17.9325 | 5.05169        | 12       |
|             | 0.6           | 17.2117 | 15.21175       | 12       |
|             | 0.8           | 8.8000  | 3.52728        | 12       |
|             | 1.0           | 3.4758  | 5.27562        | 12       |
|             | Total         |         | 12.4458        | 9.64086  |

**Levene's Test of Equality of Error Variances<sup>a</sup>**

Dependent Variable: RootLength

| F     | df1 | df2 | Sig. |
|-------|-----|-----|------|
| 4.564 | 14  | 45  | .000 |

Tests the null hypothesis that the error variance of the dependent variable is equal across groups.

a. Design: Intercept + HormoneType + Concentration + HormoneType \* Concentration

**Tests of Between-Subjects Effects**

Dependent Variable: RootLength

| Source                      | Type III Sum of Squares | df | Mean Square | F       | Sig. |
|-----------------------------|-------------------------|----|-------------|---------|------|
| Corrected Model             | 4786.467 <sup>a</sup>   | 14 | 341.891     | 22.062  | .000 |
| Intercept                   | 9293.926                | 1  | 9293.926    | 599.735 | .000 |
| HormoneType                 | 1112.444                | 2  | 556.222     | 35.893  | .000 |
| Concentration               | 1825.860                | 4  | 456.465     | 29.456  | .000 |
| HormoneType * Concentration | 1848.163                | 8  | 231.020     | 14.908  | .000 |
| Error                       | 697.352                 | 45 | 15.497      |         |      |
| Total                       | 14777.746               | 60 |             |         |      |
| Corrected Total             | 5483.820                | 59 |             |         |      |

a. R Squared = .873 (Adjusted R Squared = .833)

**Estimated Marginal Means**

**1. Grand Mean**

Dependent Variable: RootLength

| Mean   | Std. Error | 95% Confidence Interval |             |
|--------|------------|-------------------------|-------------|
|        |            | Lower Bound             | Upper Bound |
| 12.446 | .508       | 11.422                  | 13.469      |

**2. HormoneType**

**Estimates**

Dependent Variable: RootLength

| HormoneType | Mean   | Std. Error | 95% Confidence Interval |             |
|-------------|--------|------------|-------------------------|-------------|
|             |        |            | Lower Bound             | Upper Bound |
| IAA         | 7.126  | .880       | 5.353                   | 8.899       |
| IBA         | 17.672 | .880       | 15.899                  | 19.445      |
| NAA         | 12.540 | .880       | 10.767                  | 14.312      |

**Pairwise Comparisons**

Dependent Variable: RootLength

| (I) HormoneType | (J) HormoneType | Mean Difference (I-J) | Std. Error | Sig. <sup>b</sup> | 95% Confidence Interval |
|-----------------|-----------------|-----------------------|------------|-------------------|-------------------------|
|                 |                 |                       |            |                   | Lower Bound             |
| IAA             | IBA             | -10.546*              | 1.245      | .000              | -13.053                 |
|                 | NAA             | -5.414*               | 1.245      | .000              | -7.921                  |
| IBA             | IAA             | 10.546*               | 1.245      | .000              | 8.039                   |
|                 | NAA             | 5.133*                | 1.245      | .000              | 2.625                   |
| NAA             | IAA             | 5.414*                | 1.245      | .000              | 2.906                   |
|                 | IBA             | -5.133*               | 1.245      | .000              | -7.640                  |

**Pairwise Comparisons**

Dependent Variable: RootLength

| (I) HormoneType | (J) HormoneType | 95% Confidence Interval |
|-----------------|-----------------|-------------------------|
|                 |                 | Upper Bound             |
| IAA             | IBA             | -8.039                  |
|                 | NAA             | -2.906                  |
| IBA             | IAA             | 13.053                  |
|                 | NAA             | 7.640                   |
| NAA             | IAA             | 7.921                   |
|                 | IBA             | -2.625                  |

Based on estimated marginal means

\*. The mean difference is significant at the .05 level.

b. Adjustment for multiple comparisons: Least Significant Difference (equivalent to no adjustments).



### Univariate Tests

Dependent Variable: RootLength

|          | Sum of Squares | df | Mean Square | F      | Sig. |
|----------|----------------|----|-------------|--------|------|
| Contrast | 1112.444       | 2  | 556.222     | 35.893 | .000 |
| Error    | 697.352        | 45 | 15.497      |        |      |

The F tests the effect of HormoneType. This test is based on the linearly independent pairwise comparisons among the estimated marginal means.

### 3. Concentration

#### Estimates

Dependent Variable: RootLength

| Concentration | Mean   | Std. Error | 95% Confidence Interval |             |
|---------------|--------|------------|-------------------------|-------------|
|               |        |            | Lower Bound             | Upper Bound |
| 0.2           | 14.809 | 1.136      | 12.520                  | 17.098      |
| 0.4           | 17.933 | 1.136      | 15.644                  | 20.221      |
| 0.6           | 17.212 | 1.136      | 14.923                  | 19.500      |
| 0.8           | 8.800  | 1.136      | 6.511                   | 11.089      |
| 1.0           | 3.476  | 1.136      | 1.187                   | 5.765       |

#### Pairwise Comparisons

Dependent Variable: RootLength

| (I) Concentration | (J) Concentration | Mean Difference (I-J) | Std. Error | Sig. <sup>b</sup> | 95% Confidence Interval |
|-------------------|-------------------|-----------------------|------------|-------------------|-------------------------|
|                   |                   |                       |            |                   | Lower Bound             |
| 0.2               | 0.4               | -3.123                | 1.607      | .058              | -6.360                  |
|                   | 0.6               | -2.403                | 1.607      | .142              | -5.639                  |
|                   | 0.8               | 6.009*                | 1.607      | .001              | 2.772                   |
|                   | 1.0               | 11.333*               | 1.607      | .000              | 8.096                   |
| 0.4               | 0.2               | 3.123                 | 1.607      | .058              | -.114                   |
|                   | 0.6               | .721                  | 1.607      | .656              | -2.516                  |
|                   | 0.8               | 9.133*                | 1.607      | .000              | 5.896                   |
|                   | 1.0               | 14.457*               | 1.607      | .000              | 11.220                  |
| 0.6               | 0.2               | 2.403                 | 1.607      | .142              | -.834                   |
|                   | 0.4               | -.721                 | 1.607      | .656              | -3.958                  |
|                   | 0.8               | 8.412*                | 1.607      | .000              | 5.175                   |
|                   | 1.0               | 13.736*               | 1.607      | .000              | 10.499                  |
| 0.8               | 0.2               | -6.009*               | 1.607      | .001              | -9.246                  |
|                   | 0.4               | -9.133*               | 1.607      | .000              | -12.369                 |
|                   | 0.6               | -8.412*               | 1.607      | .000              | -11.649                 |
|                   | 1.0               | 5.324*                | 1.607      | .002              | 2.087                   |

**Pairwise Comparisons**

Dependent Variable: RootLength

|                   |                   | 95%<br>Confidence <sup>b</sup> ... |
|-------------------|-------------------|------------------------------------|
| (I) Concentration | (J) Concentration | Upper Bound                        |
| 0.2               | 0.4               | .114                               |
|                   | 0.6               | .834                               |
|                   | 0.8               | 9.246                              |
|                   | 1.0               | 14.570                             |
| 0.4               | 0.2               | 6.360                              |
|                   | 0.6               | 3.958                              |
|                   | 0.8               | 12.369                             |
|                   | 1.0               | 17.694                             |
| 0.6               | 0.2               | 5.639                              |
|                   | 0.4               | 2.516                              |
|                   | 0.8               | 11.649                             |
|                   | 1.0               | 16.973                             |
| 0.8               | 0.2               | -2.772                             |
|                   | 0.4               | -5.896                             |
|                   | 0.6               | -5.175                             |
|                   | 1.0               | 8.561                              |

**Pairwise Comparisons**

Dependent Variable: RootLength

|                   |                   | Mean<br>Difference (I-<br>J) | Std. Error | Sig. <sup>b</sup> | 95%<br>Confidence <sup>b</sup> ... |
|-------------------|-------------------|------------------------------|------------|-------------------|------------------------------------|
| (I) Concentration | (J) Concentration |                              |            |                   | Lower Bound                        |
| 1.0               | 0.2               | -11.333*                     | 1.607      | .000              | -14.570                            |
|                   | 0.4               | -14.457*                     | 1.607      | .000              | -17.694                            |
|                   | 0.6               | -13.736*                     | 1.607      | .000              | -16.973                            |
|                   | 0.8               | -5.324*                      | 1.607      | .002              | -8.561                             |

**Pairwise Comparisons**

Dependent Variable: RootLength

|                   |                   | 95%<br>Confidence <sup>b</sup> ... |
|-------------------|-------------------|------------------------------------|
| (I) Concentration | (J) Concentration | Upper Bound                        |
| 1.0               | 0.2               | -8.096                             |
|                   | 0.4               | -11.220                            |
|                   | 0.6               | -10.499                            |
|                   | 0.8               | -2.087                             |

Based on estimated marginal means

\*. The mean difference is significant at the .05 level.

b. Adjustment for multiple comparisons: Least Significant Difference (equivalent to no adjustments).

### Univariate Tests

Dependent Variable: RootLength

|          | Sum of Squares | df | Mean Square | F      | Sig. |
|----------|----------------|----|-------------|--------|------|
| Contrast | 1825.860       | 4  | 456.465     | 29.456 | .000 |
| Error    | 697.352        | 45 | 15.497      |        |      |

The F tests the effect of Concentration. This test is based on the linearly independent pairwise comparisons among the estimated marginal means.

### 4. HormoneType \* Concentration

Dependent Variable: RootLength

| HormoneType | Concentration | Mean        | Std. Error | 95% Confidence Interval |             |
|-------------|---------------|-------------|------------|-------------------------|-------------|
|             |               |             |            | Lower Bound             | Upper Bound |
| IAA         | 0.2           | 10.025      | 1.968      | 6.061                   | 13.989      |
|             | 0.4           | 13.048      | 1.968      | 9.083                   | 17.012      |
|             | 0.6           | 6.995       | 1.968      | 3.031                   | 10.959      |
|             | 0.8           | 5.563       | 1.968      | 1.598                   | 9.527       |
|             | 1.0           | 1.027E-013  | 1.968      | -3.964                  | 3.964       |
| IBA         | 0.2           | 15.570      | 1.968      | 11.606                  | 19.534      |
|             | 0.4           | 18.285      | 1.968      | 14.321                  | 22.249      |
|             | 0.6           | 36.395      | 1.968      | 32.431                  | 40.359      |
|             | 0.8           | 7.683       | 1.968      | 3.718                   | 11.647      |
|             | 1.0           | 10.428      | 1.968      | 6.463                   | 14.392      |
| NAA         | 0.2           | 18.833      | 1.968      | 14.868                  | 22.797      |
|             | 0.4           | 22.465      | 1.968      | 18.501                  | 26.429      |
|             | 0.6           | 8.245       | 1.968      | 4.281                   | 12.209      |
|             | 0.8           | 13.155      | 1.968      | 9.191                   | 17.119      |
|             | 1.0           | -1.346E-013 | 1.968      | -3.964                  | 3.964       |

### Post Hoc Tests

### HormoneType

### Multiple Comparisons

Dependent Variable: RootLength

Tukey HSD

| (I) HormoneType | (J) HormoneType | Mean Difference (I-J) | Std. Error | Sig. | 95% ...     |
|-----------------|-----------------|-----------------------|------------|------|-------------|
|                 |                 |                       |            |      | Lower Bound |
| IAA             | IBA             | -10.5460 <sup>*</sup> | 1.24486    | .000 | -13.5631    |
|                 | NAA             | -5.4135 <sup>*</sup>  | 1.24486    | .000 | -8.4306     |
| IBA             | IAA             | 10.5460 <sup>*</sup>  | 1.24486    | .000 | 7.5289      |
|                 | NAA             | 5.1325 <sup>*</sup>   | 1.24486    | .000 | 2.1154      |
| NAA             | IAA             | 5.4135 <sup>*</sup>   | 1.24486    | .000 | 2.3964      |
|                 | IBA             | -5.1325 <sup>*</sup>  | 1.24486    | .000 | -8.1496     |

### Multiple Comparisons

Dependent Variable: RootLength

Tukey HSD

| (I) HormoneType | (J) HormoneType | 95% ...     |
|-----------------|-----------------|-------------|
|                 |                 | Upper Bound |
| IAA             | IBA             | -7.5289     |
|                 | NAA             | -2.3964     |
| IBA             | IAA             | 13.5631     |
|                 | NAA             | 8.1496      |
| NAA             | IAA             | 8.4306      |
|                 | IBA             | -2.1154     |

Based on observed means.

The error term is Mean Square(Error) = 15.497.

\*. The mean difference is significant at the .05 level.

### Homogeneous Subsets

### RootLength

Tukey HSD<sup>a,b</sup>

| HormoneType | N  | Subset |         |         |
|-------------|----|--------|---------|---------|
|             |    | 1      | 2       | 3       |
| IAA         | 20 | 7.1260 |         |         |
| NAA         | 20 |        | 12.5395 |         |
| IBA         | 20 |        |         | 17.6720 |
| Sig.        |    | 1.000  | 1.000   | 1.000   |

Means for groups in homogeneous subsets are displayed.

Based on observed means.

The error term is Mean Square(Error) = 15.497.

a. Uses Harmonic Mean Sample Size = 20.000.

b. Alpha = .05.

## Concentration

### Multiple Comparisons

Dependent Variable: RootLength

Tukey HSD

| (I) Concentration | (J) Concentration | Mean Difference (I-J) | Std. Error | Sig. | 95% ...     |
|-------------------|-------------------|-----------------------|------------|------|-------------|
|                   |                   |                       |            |      | Lower Bound |
| 0.2               | 0.4               | -3.1233               | 1.60710    | .310 | -7.6898     |
|                   | 0.6               | -2.4025               | 1.60710    | .571 | -6.9690     |
|                   | 0.8               | 6.0092*               | 1.60710    | .005 | 1.4427      |
|                   | 1.0               | 11.3333*              | 1.60710    | .000 | 6.7668      |
| 0.4               | 0.2               | 3.1233                | 1.60710    | .310 | -1.4432     |
|                   | 0.6               | .7208                 | 1.60710    | .991 | -3.8457     |
|                   | 0.8               | 9.1325*               | 1.60710    | .000 | 4.5660      |
|                   | 1.0               | 14.4567*              | 1.60710    | .000 | 9.8902      |
| 0.6               | 0.2               | 2.4025                | 1.60710    | .571 | -2.1640     |
|                   | 0.4               | -.7208                | 1.60710    | .991 | -5.2873     |
|                   | 0.8               | 8.4117*               | 1.60710    | .000 | 3.8452      |
|                   | 1.0               | 13.7358*              | 1.60710    | .000 | 9.1693      |
| 0.8               | 0.2               | -6.0092*              | 1.60710    | .005 | -10.5757    |
|                   | 0.4               | -9.1325*              | 1.60710    | .000 | -13.6990    |
|                   | 0.6               | -8.4117*              | 1.60710    | .000 | -12.9782    |
|                   | 1.0               | 5.3242*               | 1.60710    | .015 | .7577       |
| 1.0               | 0.2               | -11.3333*             | 1.60710    | .000 | -15.8998    |
|                   | 0.4               | -14.4567*             | 1.60710    | .000 | -19.0232    |
|                   | 0.6               | -13.7358*             | 1.60710    | .000 | -18.3023    |
|                   | 0.8               | -5.3242*              | 1.60710    | .015 | -9.8907     |

### Multiple Comparisons

Dependent Variable: RootLength

Tukey HSD

|                   |                   | 95% ...     |
|-------------------|-------------------|-------------|
| (I) Concentration | (J) Concentration | Upper Bound |
| 0.2               | 0.4               | 1.4432      |
|                   | 0.6               | 2.1640      |
|                   | 0.8               | 10.5757     |
|                   | 1.0               | 15.8998     |
| 0.4               | 0.2               | 7.6898      |
|                   | 0.6               | 5.2873      |
|                   | 0.8               | 13.6990     |
|                   | 1.0               | 19.0232     |
| 0.6               | 0.2               | 6.9690      |
|                   | 0.4               | 3.8457      |
|                   | 0.8               | 12.9782     |
|                   | 1.0               | 18.3023     |
| 0.8               | 0.2               | -1.4427     |
|                   | 0.4               | -4.5660     |
|                   | 0.6               | -3.8452     |
|                   | 1.0               | 9.8907      |
| 1.0               | 0.2               | -6.7668     |
|                   | 0.4               | -9.8902     |
|                   | 0.6               | -9.1693     |
|                   | 0.8               | -.7577      |

Based on observed means.

The error term is Mean Square(Error) = 15.497.

\*. The mean difference is significant at the .05 level.

### Homogeneous Subsets

### RootLength

Tukey HSD<sup>a,b</sup>

| Concentration | N  | Subset |        |         |
|---------------|----|--------|--------|---------|
|               |    | 1      | 2      | 3       |
| 1.0           | 12 | 3.4758 |        |         |
| 0.8           | 12 |        | 8.8000 |         |
| 0.2           | 12 |        |        | 14.8092 |
| 0.6           | 12 |        |        | 17.2117 |
| 0.4           | 12 |        |        | 17.9325 |
| Sig.          |    | 1.000  | 1.000  | .310    |

Means for groups in homogeneous subsets are displayed.

Based on observed means.

The error term is Mean Square(Error) = 15.497.

a. Uses Harmonic Mean Sample Size = 12.000.

b. Alpha = .05.

```

UNIANOVA BasalCallus BY HormoneType Concentration
/METHOD=SSTYPE(3)
/INTERCEPT=INCLUDE
/POSTHOC=HormoneType Concentration(TUKEY)
/EMMEANS=TABLES(OVERALL)
/EMMEANS=TABLES(HormoneType) COMPARE ADJ(LSD)
/EMMEANS=TABLES(Concentration) COMPARE ADJ(LSD)
/EMMEANS=TABLES(HormoneType*Concentration)
/PRINT=HOMOGENEITY DESCRIPTIVE
/CRITERIA=ALPHA(.05)
/DESIGN=HormoneType Concentration HormoneType*Concentration.

```

## Univariate Analysis of Variance

**Notes**

|                        |                                |                                                                                                                                                                                                                                                                                                                                                                                                                                       |
|------------------------|--------------------------------|---------------------------------------------------------------------------------------------------------------------------------------------------------------------------------------------------------------------------------------------------------------------------------------------------------------------------------------------------------------------------------------------------------------------------------------|
| Output Created         |                                | 29-MAY-2016 23:34:51                                                                                                                                                                                                                                                                                                                                                                                                                  |
| Comments               |                                |                                                                                                                                                                                                                                                                                                                                                                                                                                       |
| Input                  | Data                           | C:\Users\SAMTA\Desktop\Julie\table 3 a,b,c12thApril twao way anova data file.sav                                                                                                                                                                                                                                                                                                                                                      |
|                        | Active Dataset                 | DataSet1                                                                                                                                                                                                                                                                                                                                                                                                                              |
|                        | Filter                         | <none>                                                                                                                                                                                                                                                                                                                                                                                                                                |
|                        | Weight                         | <none>                                                                                                                                                                                                                                                                                                                                                                                                                                |
|                        | Split File                     | <none>                                                                                                                                                                                                                                                                                                                                                                                                                                |
|                        | N of Rows in Working Data File | 60                                                                                                                                                                                                                                                                                                                                                                                                                                    |
| Missing Value Handling | Definition of Missing          | User-defined missing values are treated as missing.                                                                                                                                                                                                                                                                                                                                                                                   |
|                        | Cases Used                     | Statistics are based on all cases with valid data for all variables in the model.                                                                                                                                                                                                                                                                                                                                                     |
| Syntax                 |                                | <pre> UNIANOVA BasalCallus BY HormoneType Concentration /METHOD=SSTYPE(3) /INTERCEPT=INCLUDE /POSTHOC=HormoneType Concentration(TUKEY) /EMMEANS=TABLES(OVERALL) /EMMEANS=TABLES (HormoneType) COMPARE ADJ (LSD) /EMMEANS=TABLES (Concentration) COMPARE ADJ (LSD) /EMMEANS=TABLES (HormoneType*Concentration) /PRINT=HOMOGENEITY DESCRIPTIVE /CRITERIA=ALPHA(.05) /DESIGN=HormoneType Concentration HormoneType*Concentration. </pre> |
| Resources              | Processor Time                 | 00:00:00.11                                                                                                                                                                                                                                                                                                                                                                                                                           |
|                        | Elapsed Time                   | 00:00:00.17                                                                                                                                                                                                                                                                                                                                                                                                                           |

[DataSet1] C:\Users\SAMTA\Desktop\Julie\table 3 a,b,c12thApril twao way anova data file.sav



**Between-Subjects Factors**

|               |      | Value Label | N  |
|---------------|------|-------------|----|
| HormoneType   | 1.00 | IAA         | 20 |
|               | 2.00 | IBA         | 20 |
|               | 3.00 | NAA         | 20 |
| Concentration | 1.00 | 0.2         | 12 |
|               | 2.00 | 0.4         | 12 |
|               | 3.00 | 0.6         | 12 |
|               | 4.00 | 0.8         | 12 |
|               | 5.00 | 1.0         | 12 |

**Descriptive Statistics**

Dependent Variable: BasalCallus

| HormoneType | Concentration | Mean    | Std. Deviation | N       |
|-------------|---------------|---------|----------------|---------|
| IAA         | 0.2           | .0000   | .00000         | 4       |
|             | 0.4           | .0000   | .00000         | 4       |
|             | 0.6           | 3.2175  | .77937         | 4       |
|             | 0.8           | 5.5700  | .43344         | 4       |
|             | 1.0           | 17.4325 | 2.10905        | 4       |
|             | Total         |         | 5.2440         | 6.67602 |
| IBA         | 0.2           | .0000   | .00000         | 4       |
|             | 0.4           | .0000   | .00000         | 4       |
|             | 0.6           | .0000   | .00000         | 4       |
|             | 0.8           | .0000   | .00000         | 4       |
|             | 1.0           | 7.0575  | 1.46170        | 4       |
|             | Total         |         | 1.4115         | 2.95400 |
| NAA         | 0.2           | .0000   | .00000         | 4       |
|             | 0.4           | 7.1750  | 1.45177        | 4       |
|             | 0.6           | 10.1800 | 1.66022        | 4       |
|             | 0.8           | 12.0550 | .69092         | 4       |
|             | 1.0           | 21.8925 | .35818         | 4       |
|             | Total         |         | 10.2605        | 7.36179 |
| Total       | 0.2           | .0000   | .00000         | 12      |
|             | 0.4           | 2.3917  | 3.61316        | 12      |
|             | 0.6           | 4.4658  | 4.53978        | 12      |
|             | 0.8           | 5.8750  | 5.16280        | 12      |
|             | 1.0           | 15.4608 | 6.63063        | 12      |
|             | Total         |         | 5.6387         | 6.92582 |

**Levene's Test of Equality of Error Variances<sup>a</sup>**

Dependent Variable: BasalCallus

| F     | df1 | df2 | Sig. |
|-------|-----|-----|------|
| 4.425 | 14  | 45  | .000 |

Tests the null hypothesis that the error variance of the dependent variable is equal across groups.

a. Design: Intercept + HormoneType + Concentration + HormoneType \* Concentration

**Tests of Between-Subjects Effects**

Dependent Variable: BasalCallus

| Source                      | Type III Sum of Squares | df | Mean Square | F        | Sig. |
|-----------------------------|-------------------------|----|-------------|----------|------|
| Corrected Model             | 2791.507 <sup>a</sup>   | 14 | 199.393     | 232.763  | .000 |
| Intercept                   | 1907.674                | 1  | 1907.674    | 2226.932 | .000 |
| HormoneType                 | 787.721                 | 2  | 393.860     | 459.775  | .000 |
| Concentration               | 1682.927                | 4  | 420.732     | 491.143  | .000 |
| HormoneType * Concentration | 320.859                 | 8  | 40.107      | 46.820   | .000 |
| Error                       | 38.549                  | 45 | .857        |          |      |
| Total                       | 4737.729                | 60 |             |          |      |
| Corrected Total             | 2830.056                | 59 |             |          |      |

a. R Squared = .986 (Adjusted R Squared = .982)

**Estimated Marginal Means**

**1. Grand Mean**

Dependent Variable: BasalCallus

| Mean  | Std. Error | 95% Confidence Interval |             |
|-------|------------|-------------------------|-------------|
|       |            | Lower Bound             | Upper Bound |
| 5.639 | .119       | 5.398                   | 5.879       |

**2. HormoneType**

**Estimates**

Dependent Variable: BasalCallus

| HormoneType | Mean   | Std. Error | 95% Confidence Interval |             |
|-------------|--------|------------|-------------------------|-------------|
|             |        |            | Lower Bound             | Upper Bound |
| IAA         | 5.244  | .207       | 4.827                   | 5.661       |
| IBA         | 1.412  | .207       | .995                    | 1.828       |
| NAA         | 10.261 | .207       | 9.844                   | 10.677      |

**Pairwise Comparisons**

Dependent Variable: BasalCallus

| (I) HormoneType | (J) HormoneType | Mean Difference (I-J) | Std. Error | Sig. <sup>b</sup> | 95% Confidence Interval |
|-----------------|-----------------|-----------------------|------------|-------------------|-------------------------|
|                 |                 |                       |            |                   | Lower Bound             |
| IAA             | IBA             | 3.833 <sup>*</sup>    | .293       | .000              | 3.243                   |
|                 | NAA             | -5.017 <sup>*</sup>   | .293       | .000              | -5.606                  |
| IBA             | IAA             | -3.833 <sup>*</sup>   | .293       | .000              | -4.422                  |
|                 | NAA             | -8.849 <sup>*</sup>   | .293       | .000              | -9.438                  |
| NAA             | IAA             | 5.017 <sup>*</sup>    | .293       | .000              | 4.427                   |
|                 | IBA             | 8.849 <sup>*</sup>    | .293       | .000              | 8.260                   |

**Pairwise Comparisons**

Dependent Variable: BasalCallus

| (I) HormoneType | (J) HormoneType | 95% Confidence Interval |
|-----------------|-----------------|-------------------------|
|                 |                 | Upper Bound             |
| IAA             | IBA             | 4.422                   |
|                 | NAA             | -4.427                  |
| IBA             | IAA             | -3.243                  |
|                 | NAA             | -8.260                  |
| NAA             | IAA             | 5.606                   |
|                 | IBA             | 9.438                   |

Based on estimated marginal means

\*. The mean difference is significant at the .05 level.

b. Adjustment for multiple comparisons: Least Significant Difference (equivalent to no adjustments).

### Univariate Tests

Dependent Variable: BasalCallus

|          | Sum of Squares | df | Mean Square | F       | Sig. |
|----------|----------------|----|-------------|---------|------|
| Contrast | 787.721        | 2  | 393.860     | 459.775 | .000 |
| Error    | 38.549         | 45 | .857        |         |      |

The F tests the effect of HormoneType. This test is based on the linearly independent pairwise comparisons among the estimated marginal means.

### 3. Concentration

#### Estimates

Dependent Variable: BasalCallus

| Concentration | Mean        | Std. Error | 95% Confidence Interval |             |
|---------------|-------------|------------|-------------------------|-------------|
|               |             |            | Lower Bound             | Upper Bound |
| 0.2           | -1.113E-013 | .267       | -.538                   | .538        |
| 0.4           | 2.392       | .267       | 1.854                   | 2.930       |
| 0.6           | 4.466       | .267       | 3.928                   | 5.004       |
| 0.8           | 5.875       | .267       | 5.337                   | 6.413       |
| 1.0           | 15.461      | .267       | 14.923                  | 15.999      |

#### Pairwise Comparisons

Dependent Variable: BasalCallus

| (I) Concentration | (J) Concentration | Mean Difference (I-J) | Std. Error | Sig. <sup>b</sup> | 95% Confidence Interval |
|-------------------|-------------------|-----------------------|------------|-------------------|-------------------------|
|                   |                   |                       |            |                   | Lower Bound             |
| 0.2               | 0.4               | -2.392*               | .378       | .000              | -3.153                  |
|                   | 0.6               | -4.466*               | .378       | .000              | -5.227                  |
|                   | 0.8               | -5.875*               | .378       | .000              | -6.636                  |
|                   | 1.0               | -15.461*              | .378       | .000              | -16.222                 |
| 0.4               | 0.2               | 2.392*                | .378       | .000              | 1.631                   |
|                   | 0.6               | -2.074*               | .378       | .000              | -2.835                  |
|                   | 0.8               | -3.483*               | .378       | .000              | -4.244                  |
|                   | 1.0               | -13.069*              | .378       | .000              | -13.830                 |
| 0.6               | 0.2               | 4.466*                | .378       | .000              | 3.705                   |
|                   | 0.4               | 2.074*                | .378       | .000              | 1.313                   |
|                   | 0.8               | -1.409*               | .378       | .001              | -2.170                  |
|                   | 1.0               | -10.995*              | .378       | .000              | -11.756                 |
| 0.8               | 0.2               | 5.875*                | .378       | .000              | 5.114                   |
|                   | 0.4               | 3.483*                | .378       | .000              | 2.722                   |
|                   | 0.6               | 1.409*                | .378       | .001              | .648                    |
|                   | 1.0               | -9.586*               | .378       | .000              | -10.347                 |

**Pairwise Comparisons**

Dependent Variable: BasalCallus

|                   |                   | 95% Confidence Int. |
|-------------------|-------------------|---------------------|
| (I) Concentration | (J) Concentration | Upper Bound         |
| 0.2               | 0.4               | -1.631              |
|                   | 0.6               | -3.705              |
|                   | 0.8               | -5.114              |
|                   | 1.0               | -14.700             |
| 0.4               | 0.2               | 3.153               |
|                   | 0.6               | -1.313              |
|                   | 0.8               | -2.722              |
|                   | 1.0               | -12.308             |
| 0.6               | 0.2               | 5.227               |
|                   | 0.4               | 2.835               |
|                   | 0.8               | -.648               |
|                   | 1.0               | -10.234             |
| 0.8               | 0.2               | 6.636               |
|                   | 0.4               | 4.244               |
|                   | 0.6               | 2.170               |
|                   | 1.0               | -8.825              |

**Pairwise Comparisons**

Dependent Variable: BasalCallus

|                   |                   | Mean Difference (I-J) | Std. Error | Sig.         | 95% Confidence Interval |
|-------------------|-------------------|-----------------------|------------|--------------|-------------------------|
| (I) Concentration | (J) Concentration |                       |            | <sup>b</sup> | Lower Bound             |
| 1.0               | 0.2               | 15.461*               | .378       | .000         | 14.700                  |
|                   | 0.4               | 13.069*               | .378       | .000         | 12.308                  |
|                   | 0.6               | 10.995*               | .378       | .000         | 10.234                  |
|                   | 0.8               | 9.586*                | .378       | .000         | 8.825                   |

**Pairwise Comparisons**

Dependent Variable: BasalCallus

|                   |                   | 95% Confidence Int. |
|-------------------|-------------------|---------------------|
| (I) Concentration | (J) Concentration | Upper Bound         |
| 1.0               | 0.2               | 16.222              |
|                   | 0.4               | 13.830              |
|                   | 0.6               | 11.756              |
|                   | 0.8               | 10.347              |

Based on estimated marginal means

\*. The mean difference is significant at the .05 level.

b. Adjustment for multiple comparisons: Least Significant Difference (equivalent to no adjustments).

### Univariate Tests

Dependent Variable: BasalCallus

|          | Sum of Squares | df | Mean Square | F       | Sig. |
|----------|----------------|----|-------------|---------|------|
| Contrast | 1682.927       | 4  | 420.732     | 491.143 | .000 |
| Error    | 38.549         | 45 | .857        |         |      |

The F tests the effect of Concentration. This test is based on the linearly independent pairwise comparisons among the estimated marginal means.

### 4. HormoneType \* Concentration

Dependent Variable: BasalCallus

| HormoneType | Concentration | Mean        | Std. Error | 95% Confidence Interval |             |
|-------------|---------------|-------------|------------|-------------------------|-------------|
|             |               |             |            | Lower Bound             | Upper Bound |
| IAA         | 0.2           | -1.071E-013 | .463       | -.932                   | .932        |
|             | 0.4           | -1.036E-013 | .463       | -.932                   | .932        |
|             | 0.6           | 3.218       | .463       | 2.285                   | 4.150       |
|             | 0.8           | 5.570       | .463       | 4.638                   | 6.502       |
|             | 1.0           | 17.433      | .463       | 16.500                  | 18.365      |
| IBA         | 0.2           | -1.071E-013 | .463       | -.932                   | .932        |
|             | 0.4           | -1.027E-013 | .463       | -.932                   | .932        |
|             | 0.6           | -1.036E-013 | .463       | -.932                   | .932        |
|             | 0.8           | .000        | .463       | -.932                   | .932        |
|             | 1.0           | 7.058       | .463       | 6.125                   | 7.990       |
| NAA         | 0.2           | -1.213E-013 | .463       | -.932                   | .932        |
|             | 0.4           | 7.175       | .463       | 6.243                   | 8.107       |
|             | 0.6           | 10.180      | .463       | 9.248                   | 11.112      |
|             | 0.8           | 12.055      | .463       | 11.123                  | 12.987      |
|             | 1.0           | 21.893      | .463       | 20.960                  | 22.825      |

### Post Hoc Tests

### HormoneType

### Multiple Comparisons

Dependent Variable: BasalCallus

Tukey HSD

| (I) HormoneType | (J) HormoneType | Mean Difference (I-J) | Std. Error | Sig. | 95% ...     |
|-----------------|-----------------|-----------------------|------------|------|-------------|
|                 |                 |                       |            |      | Lower Bound |
| IAA             | IBA             | 3.8325*               | .29268     | .000 | 3.1231      |
|                 | NAA             | -5.0165*              | .29268     | .000 | -5.7259     |
| IBA             | IAA             | -3.8325*              | .29268     | .000 | -4.5419     |
|                 | NAA             | -8.8490*              | .29268     | .000 | -9.5584     |
| NAA             | IAA             | 5.0165*               | .29268     | .000 | 4.3071      |
|                 | IBA             | 8.8490*               | .29268     | .000 | 8.1396      |

### Multiple Comparisons

Dependent Variable: BasalCallus

Tukey HSD

| (I) HormoneType | (J) HormoneType | 95% ...     |
|-----------------|-----------------|-------------|
|                 |                 | Upper Bound |
| IAA             | IBA             | 4.5419      |
|                 | NAA             | -4.3071     |
| IBA             | IAA             | -3.1231     |
|                 | NAA             | -8.1396     |
| NAA             | IAA             | 5.7259      |
|                 | IBA             | 9.5584      |

Based on observed means.

The error term is Mean Square(Error) = .857.

\*. The mean difference is significant at the .05 level.

### Homogeneous Subsets

### BasalCallus

Tukey HSD<sup>a,b</sup>

| HormoneType | N  | Subset |        |         |
|-------------|----|--------|--------|---------|
|             |    | 1      | 2      | 3       |
| IBA         | 20 | 1.4115 |        |         |
| IAA         | 20 |        | 5.2440 |         |
| NAA         | 20 |        |        | 10.2605 |
| Sig.        |    | 1.000  | 1.000  | 1.000   |

Means for groups in homogeneous subsets are displayed.

Based on observed means.

The error term is Mean Square(Error) = .857.

a. Uses Harmonic Mean Sample Size = 20.000.

b. Alpha = .05.

## Concentration

### Multiple Comparisons

Dependent Variable: BasalCallus

Tukey HSD

| (I) Concentration | (J) Concentration | Mean Difference (I-J) | Std. Error | Sig. | 95% ...     |
|-------------------|-------------------|-----------------------|------------|------|-------------|
|                   |                   |                       |            |      | Lower Bound |
| 0.2               | 0.4               | -2.3917*              | .37785     | .000 | -3.4653     |
|                   | 0.6               | -4.4658*              | .37785     | .000 | -5.5395     |
|                   | 0.8               | -5.8750*              | .37785     | .000 | -6.9487     |
|                   | 1.0               | -15.4608*             | .37785     | .000 | -16.5345    |
| 0.4               | 0.2               | 2.3917*               | .37785     | .000 | 1.3180      |
|                   | 0.6               | -2.0742*              | .37785     | .000 | -3.1478     |
|                   | 0.8               | -3.4833*              | .37785     | .000 | -4.5570     |
|                   | 1.0               | -13.0692*             | .37785     | .000 | -14.1428    |
| 0.6               | 0.2               | 4.4658*               | .37785     | .000 | 3.3922      |
|                   | 0.4               | 2.0742*               | .37785     | .000 | 1.0005      |
|                   | 0.8               | -1.4092               | .37785     | .005 | -2.4828     |
|                   | 1.0               | -10.9950*             | .37785     | .000 | -12.0687    |
| 0.8               | 0.2               | 5.8750*               | .37785     | .000 | 4.8013      |
|                   | 0.4               | 3.4833*               | .37785     | .000 | 2.4097      |
|                   | 0.6               | 1.4092                | .37785     | .005 | .3355       |
|                   | 1.0               | -9.5858*              | .37785     | .000 | -10.6595    |
| 1.0               | 0.2               | 15.4608*              | .37785     | .000 | 14.3872     |
|                   | 0.4               | 13.0692*              | .37785     | .000 | 11.9955     |
|                   | 0.6               | 10.9950*              | .37785     | .000 | 9.9213      |
|                   | 0.8               | 9.5858*               | .37785     | .000 | 8.5122      |



### Multiple Comparisons

Dependent Variable: BasalCallus

Tukey HSD

|                   |                   | 95% ...     |
|-------------------|-------------------|-------------|
| (I) Concentration | (J) Concentration | Upper Bound |
| 0.2               | 0.4               | -1.3180     |
|                   | 0.6               | -3.3922     |
|                   | 0.8               | -4.8013     |
|                   | 1.0               | -14.3872    |
| 0.4               | 0.2               | 3.4653      |
|                   | 0.6               | -1.0005     |
|                   | 0.8               | -2.4097     |
|                   | 1.0               | -11.9955    |
| 0.6               | 0.2               | 5.5395      |
|                   | 0.4               | 3.1478      |
|                   | 0.8               | -.3355      |
|                   | 1.0               | -9.9213     |
| 0.8               | 0.2               | 6.9487      |
|                   | 0.4               | 4.5570      |
|                   | 0.6               | 2.4828      |
|                   | 1.0               | -8.5122     |
| 1.0               | 0.2               | 16.5345     |
|                   | 0.4               | 14.1428     |
|                   | 0.6               | 12.0687     |
|                   | 0.8               | 10.6595     |

Based on observed means.

The error term is Mean Square(Error) = .857.

\*. The mean difference is significant at the .05 level.

### Homogeneous Subsets

**BasalCallus**

Tukey HSD<sup>a,b</sup>

| Concentration | N  | Subset |        |        |        |         |
|---------------|----|--------|--------|--------|--------|---------|
|               |    | 1      | 2      | 3      | 4      | 5       |
| 0.2           | 12 | .0000  |        |        |        |         |
| 0.4           | 12 |        | 2.3917 |        |        |         |
| 0.6           | 12 |        |        | 4.4658 |        |         |
| 0.8           | 12 |        |        |        | 5.8750 |         |
| 1.0           | 12 |        |        |        |        | 15.4608 |
| Sig.          |    | 1.000  | 1.000  | 1.000  | 1.000  | 1.000   |

Means for groups in homogeneous subsets are displayed.

Based on observed means.

The error term is Mean Square(Error) = .857.

a. Uses Harmonic Mean Sample Size = 12.000.

b. Alpha = .05.
